# Supplementary material
Source: publisher site journal article supplement (https://www.dovepress.com/article/470847)
Supplement: Supplementary file 1 [file get_supplementary_file.php]

**Supporting information**

# Ultrasound-responsive nanodelivery system of GPC3-targeting and sonosensitizer for visualized hepatocellular carcinoma therapy

Juying Zhang,1 Xia Luo,1 Xin Yang,1 Hanmei Li,1 Qiong Jiang,1 You Yang,1 Menglin Luo,1 Zijun Ma,1 Ping He,1 Linli Feng,1 Ling Li,1 Maochun Zhang,1 Yang Li,2,3 and Jinhong Yu1,3

1 Department of Ultrasound, Affiliated Hospital of North Sichuan Medical College, Innovation Centre for Science and Technology of North Sichuan Medical College, Nanchong, 637000 Sichuan, China; 2 Department of Radiology, Affiliated Hospital of North Sichuan Medical College, Nanchong, 637000 Sichuan, China; 3 Department of Ultrasound, Yuechi People’s Hospital, Guangan, 638300 Sichuan, China

Correspondence: Jinhong Yu, E-mail: yujinhong@nsmc.edu.cn.


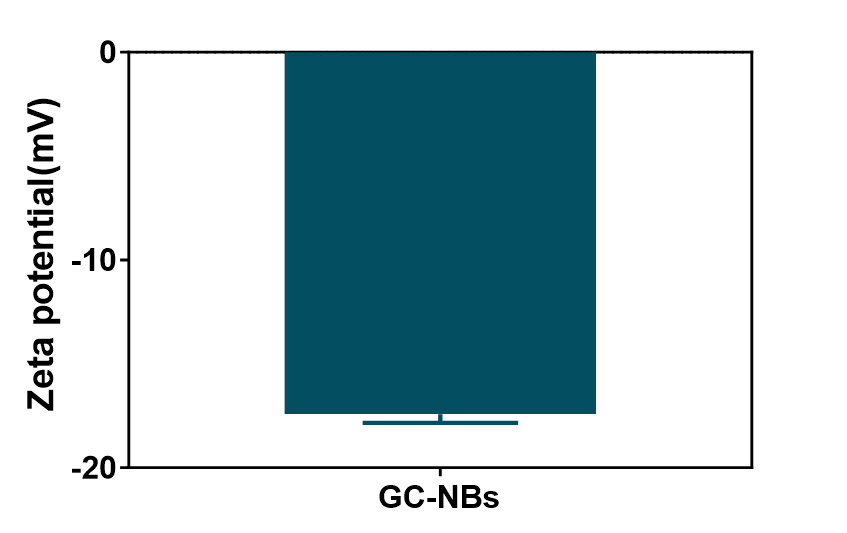


Figure S1. Zeta potential of GC-NBs.


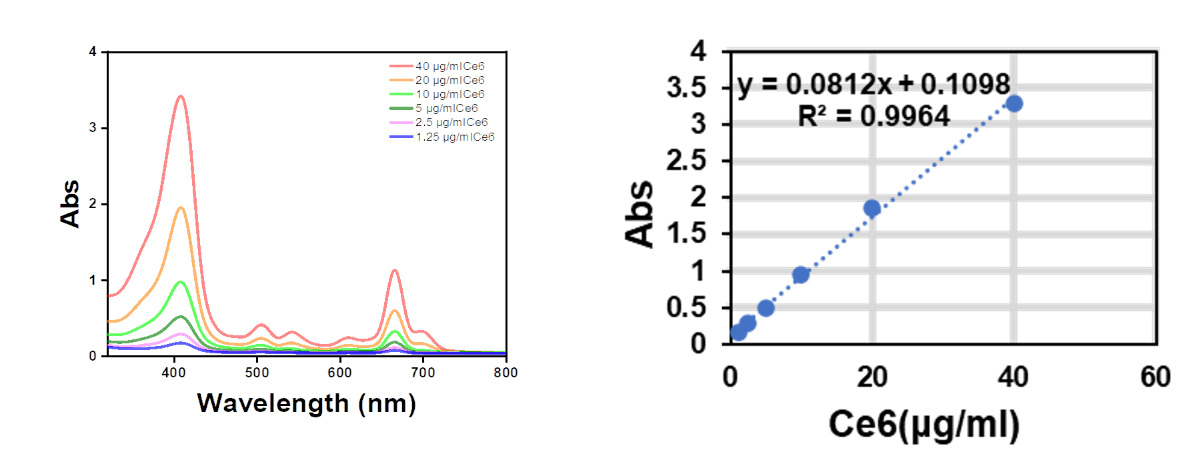


Figure S2. Standard curve of Ce6.


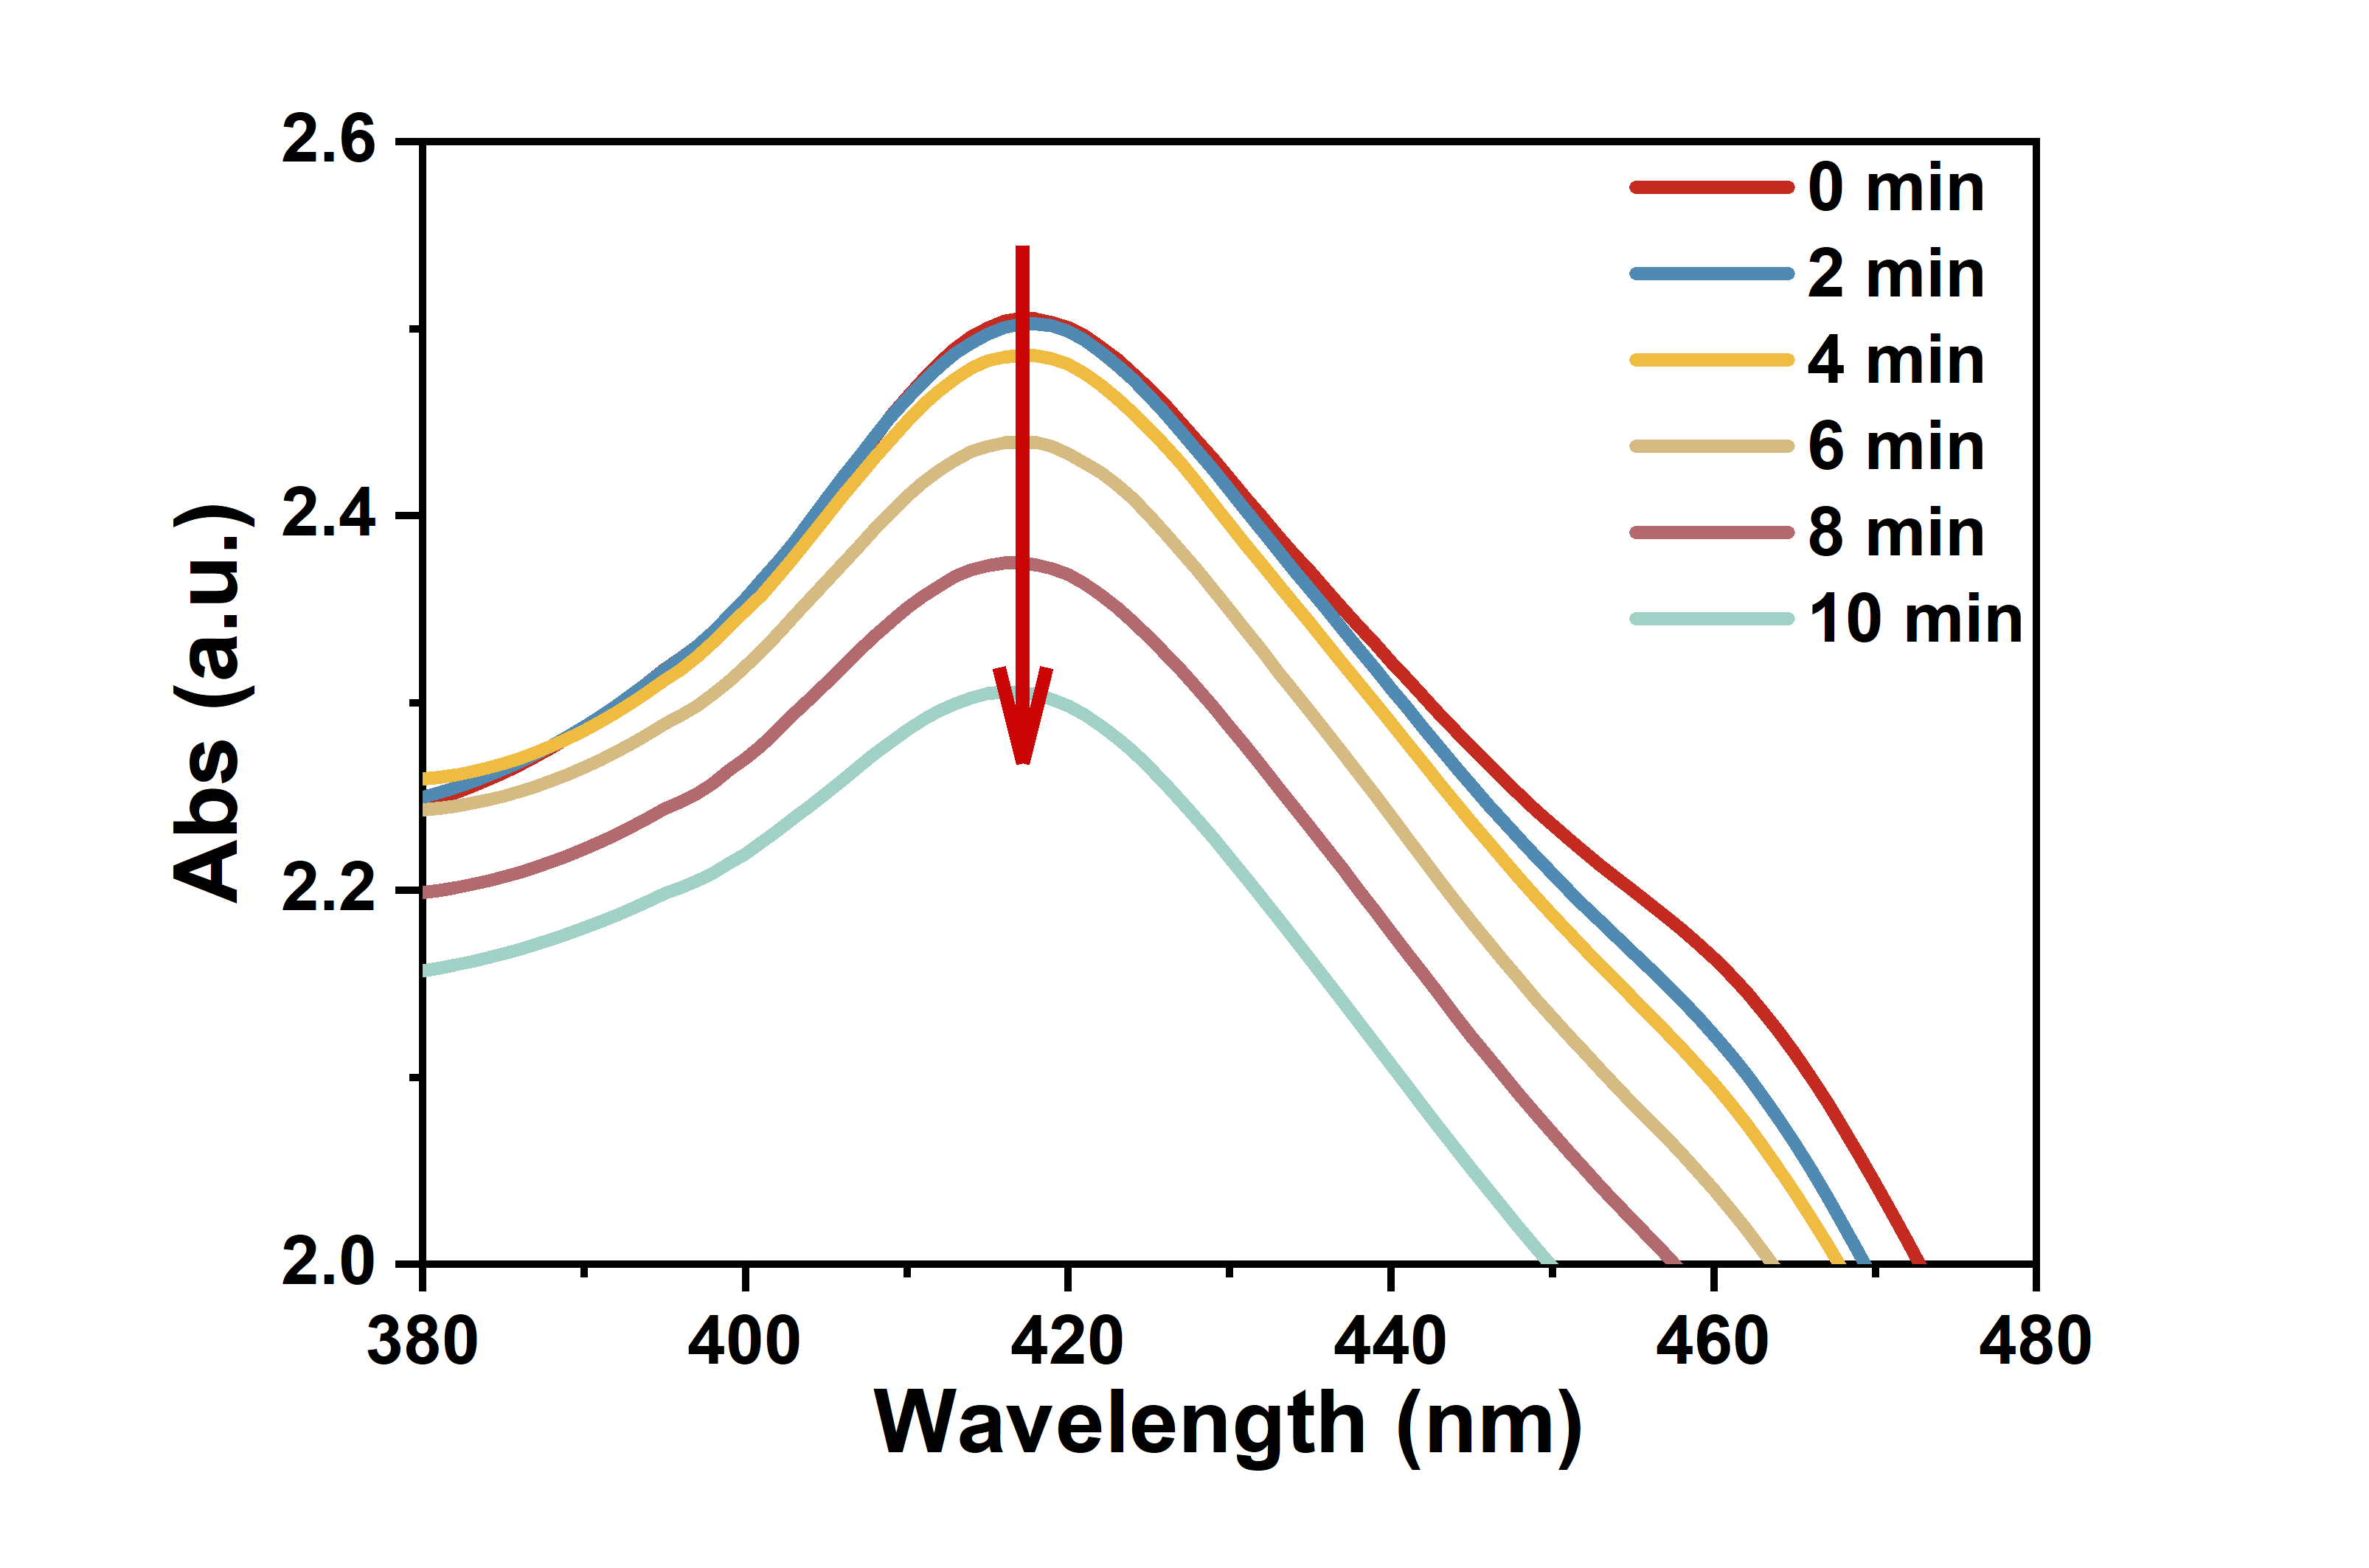


Figure S3. 1O2 production of GC-NBs under ultrasound irradiation.


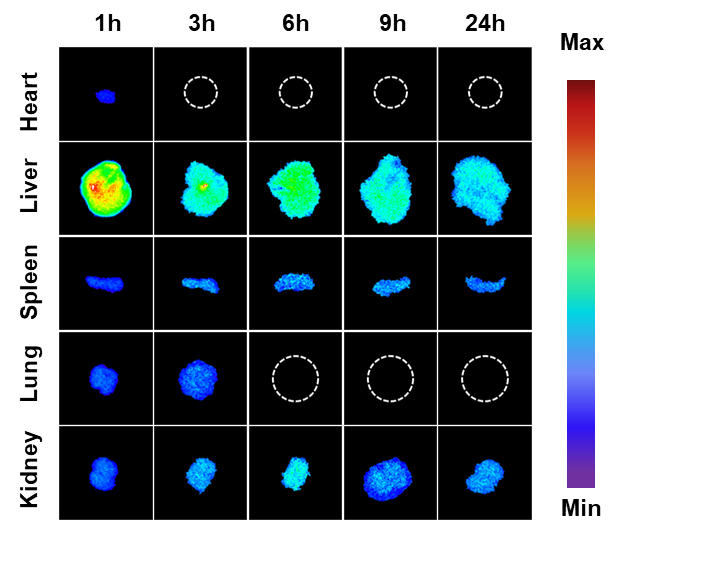


Figure S4. Biodistribution of GC-NBs.


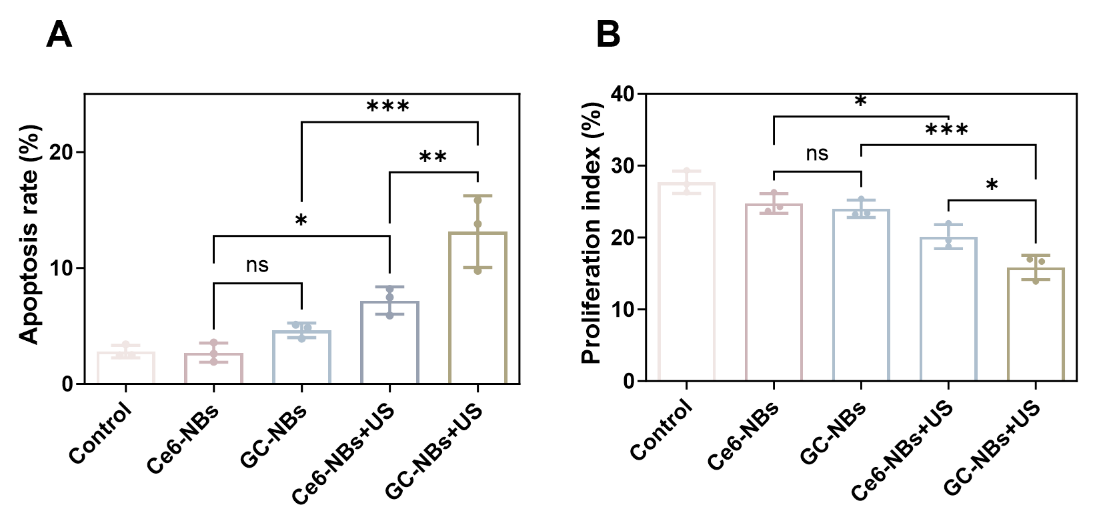


Figure S5. (A) Statistical results of apoptosis rate in tumor tissue. (B) Proliferation index of tumor tissue. Data are presented as mean ± SD, n = 3; **P* < 0.05, ***P* < 0.01, ****P* < 0.001.

**A**

**B**

Figure S6. The changes of alanine aminotransferase (ALT) and aspartate aminotransferase (AST) of mice after different treatments. (Data are presented as mean ± SD, n = 3).


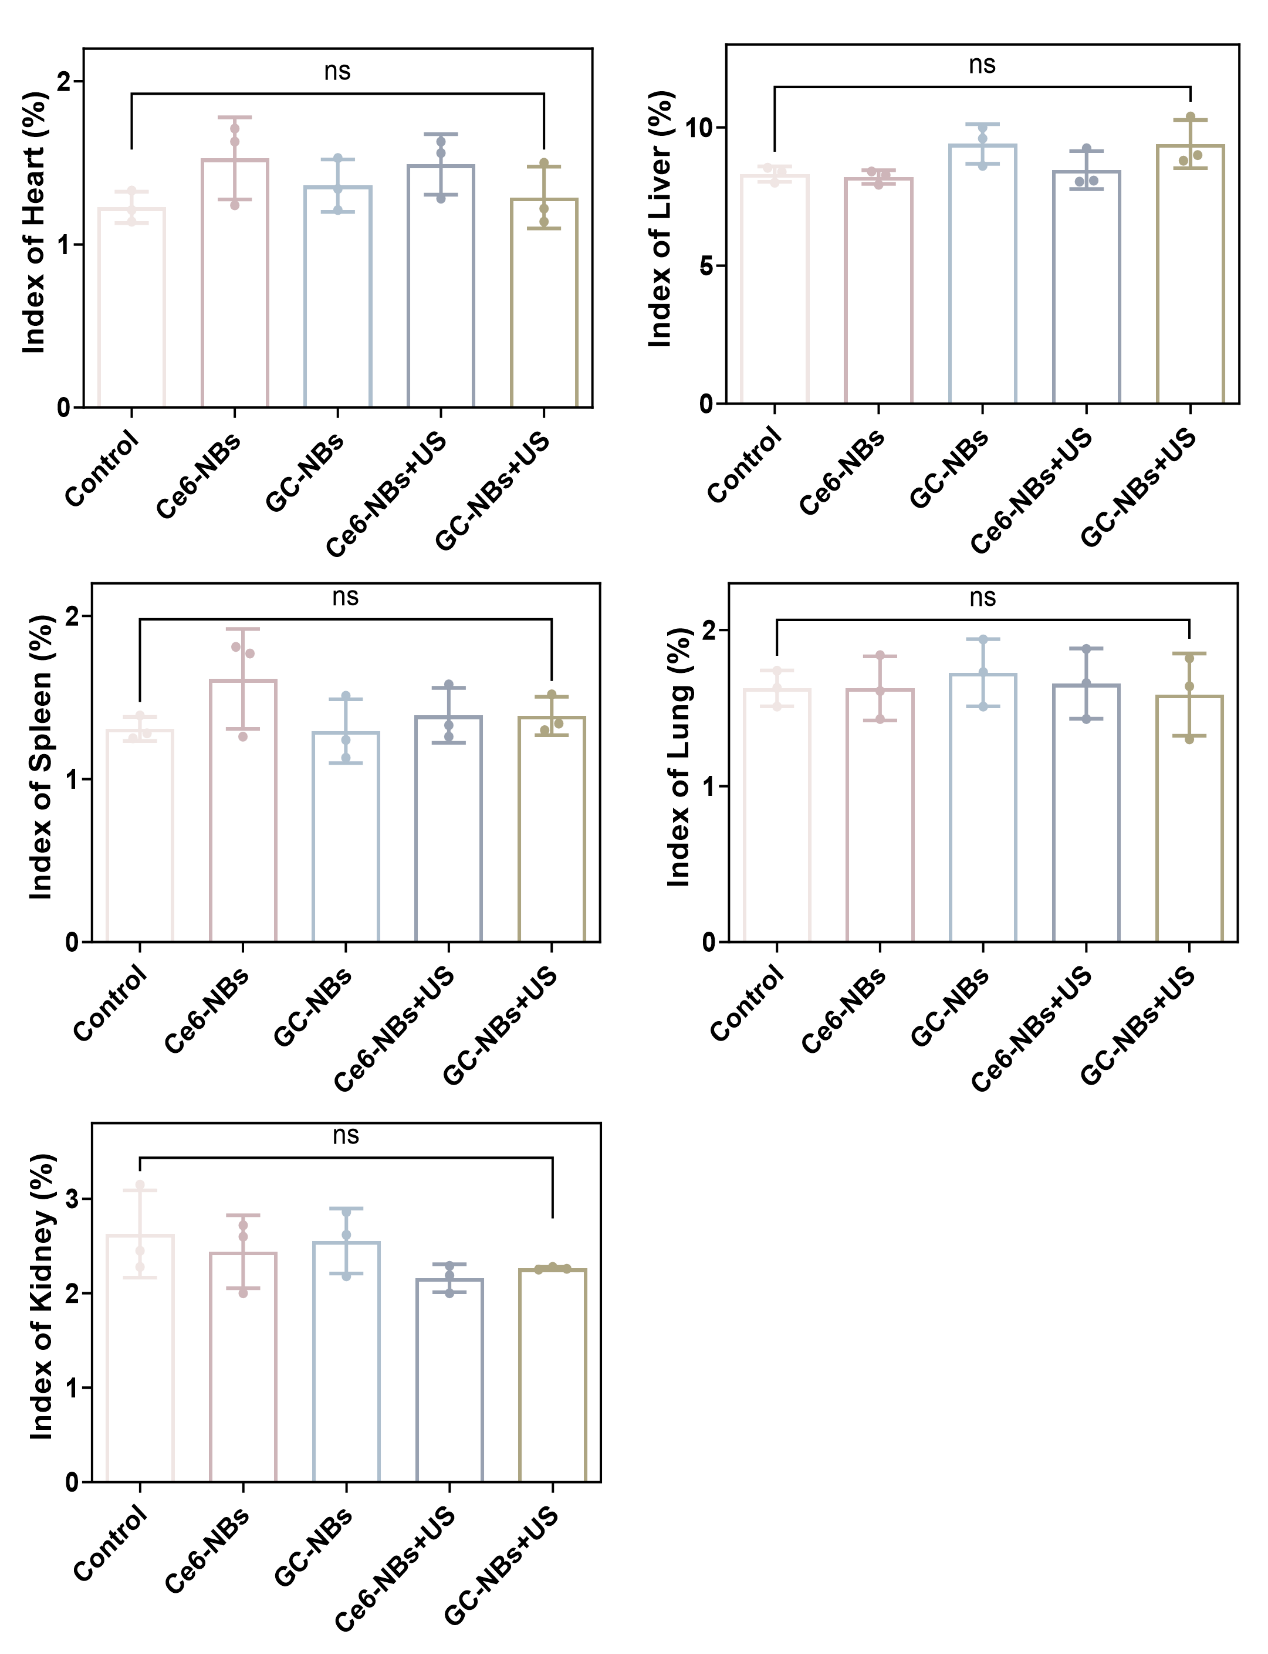


Figure S7. Major organs indexes of mice after different treatments. Data are presented as mean ± SD, n = 3.


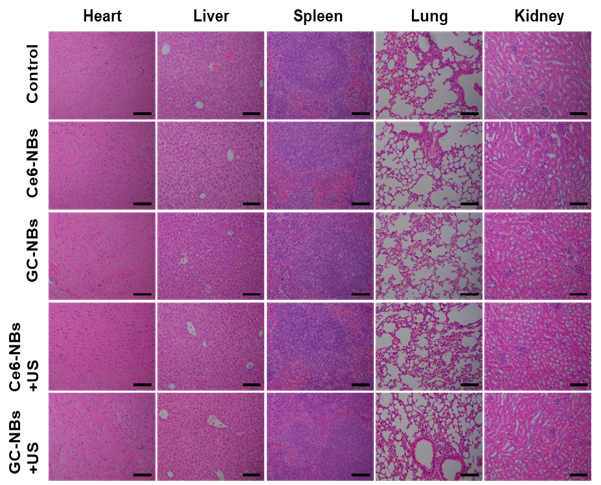


Figure S8. H&E staining of major organs from different groups. Scale bar: 100 μm.
